# Supplementary material for: Two-dimensional inverted planar perovskite solar cells with efficiency over 15% via solvent and interface engineering
Source: Royal Society of Chemistry journal article supplement (doi:10.1039/c9ta04658e), 2019-01-01
Supplement: c9ta04658e1.pdf [file c9ta04658e1.pdf]

## Supporting Information

### Two-dimensional inverted planar perovskite solar cells with efficiency over 15% via solvent and interface engineering

Xiaomei Lian,<sup>a,b</sup> Jiehuan Chen,<sup>a,b</sup> Yingzhu Zhang,<sup>a,b</sup> Shuoxun Tian,<sup>a,b</sup> Minchao Qin,<sup>c</sup> Jun Li,<sup>a,b</sup> Thomas Rieks Andersen,<sup>a,b</sup> Gang Wu\*,<sup>a,b</sup> Xinhui Lu,<sup>c</sup> and Hongzheng Chen\*<sup>a,b</sup>

<sup>a</sup>State Key Laboratory of Silicon Materials, MOE Key Laboratory of Macromolecular Synthesis and Functionalization, Department of Polymer Science and Engineering, Zhejiang University, Hangzhou 310027, P. R. China. E-mails: [samy@zju.edu.cn](mailto:samy@zju.edu.cn), [hzchen@zju.edu.cn](mailto:hzchen@zju.edu.cn)

<sup>b</sup>State Key Laboratory of Silicon Materials, Zhejiang University, Hangzhou 310027, P. R. China

<sup>c</sup>Department of Physics, The Chinese University of Hong Kong, New Territories 999077, Hong Kong, P. R. China

**Keywords:** 2D perovskite, solvent engineering, interface engineering, formamide, PCP-Na

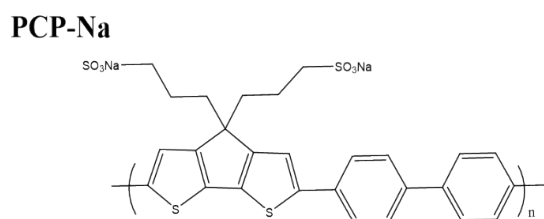

**Figure S1.** Chemical structure of PCP-Na.

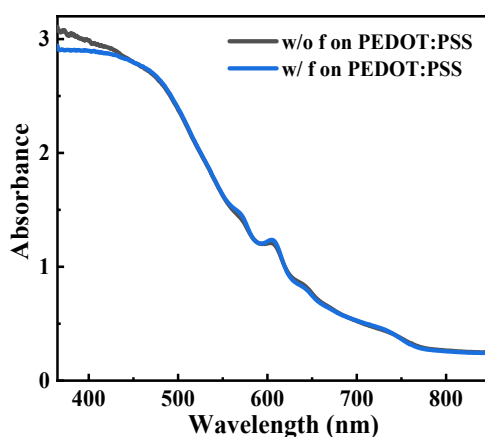

**Figure S2.** Absorption spectra of (BA,GA)<sub>2</sub>MA<sub>4</sub>Pb<sub>5</sub>I<sub>16</sub> perovskite films with and without formamide addition on PEDOT:PSS substrate.

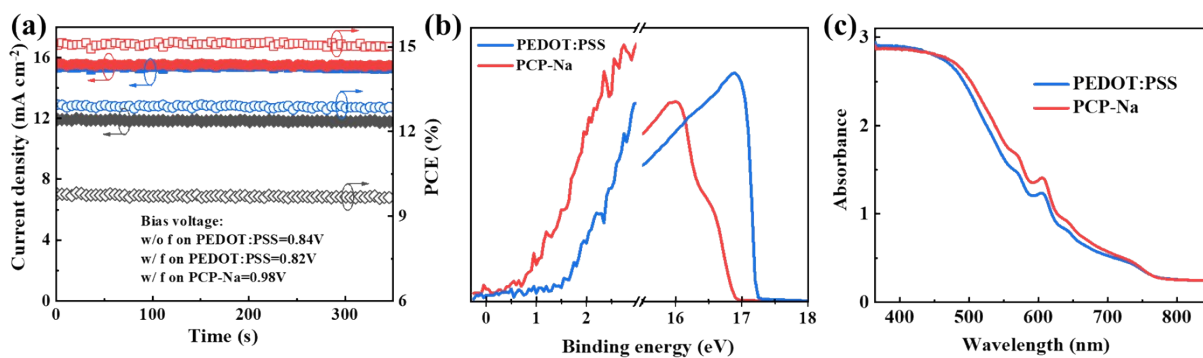

**Figure S3.** (a) Stabilized photocurrent measurement under 1 sun condition of the  $(\text{BA,GA})_2\text{MA}_4\text{Pb}_5\text{I}_{16}$  based PVSCs without or with formamide addition on different substrates. (b) The UPS spectra, (c) UV-Vis spectra of the  $(\text{BA,GA})_2(\text{MA})_4\text{Pb}_5\text{I}_{16}$  perovskite films with formamide addition on different substrates.

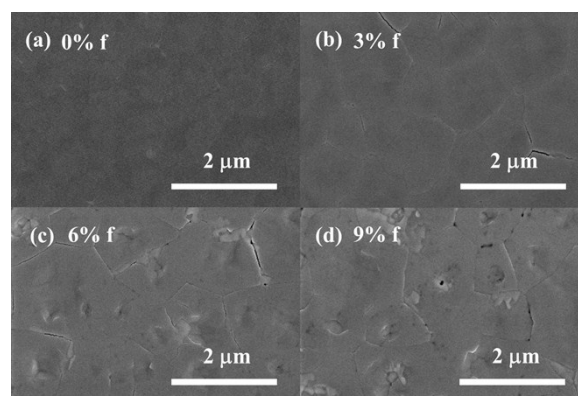

**Figure S4.** Top-view SEM images of  $(\text{BA,GA})_2\text{MA}_4\text{Pb}_5\text{I}_{16}$  perovskite films fabricated with different amounts of formamide on PEDOT:PSS substrate.

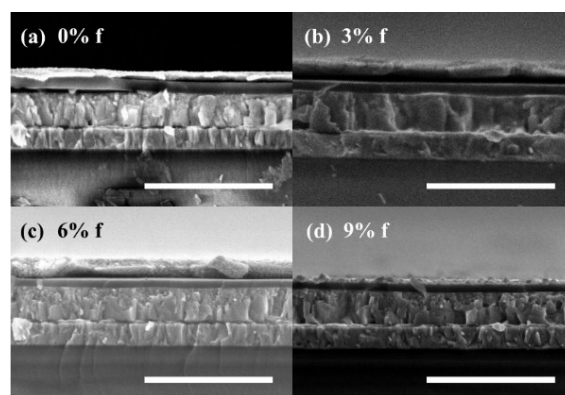

**Figure S5.** Cross-sectional SEM images of  $(\text{BA,GA})_2\text{MA}_4\text{Pb}_5\text{I}_{16}$  perovskite films fabricated with different amounts of formamide on PEDOT:PSS substrate. (The scale bar is 1 μm.)

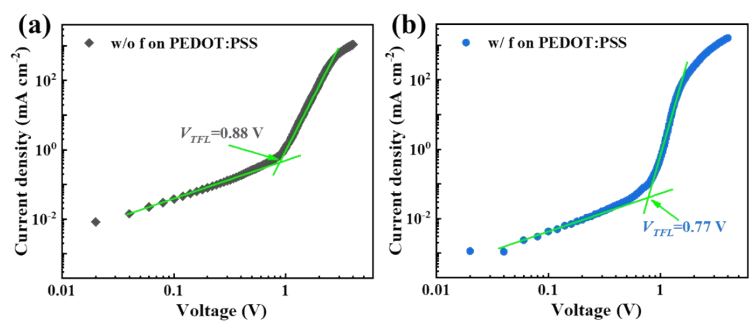

**Figure S6.** Dark current-voltage measurements of the electron-only devices for the  $(\text{BA,GA})_2\text{MA}_4\text{Pb}_5\text{I}_{16}$  perovskite with and without formamide addition. The defect density could be calculated by equation  $N_{\text{defects}} = 2\epsilon\epsilon_0V_{\text{TFL}}/eL^2$  (*Science* **2015**, 347, 967) ( $\epsilon$  and  $\epsilon_0$  are the dielectric constants of perovskite and the vacuum permittivity, respectively,  $L$  is the thickness of the obtained perovskite film, about 300 nm in this study, and  $e$  is the elementary charge). When  $\epsilon$  is constant,  $N_{\text{defects}}$  is in direct proportion to  $V_{\text{TFL}}$ . Therefore, the decrease of  $V_{\text{TFL}}$  indicating the reduced electron trap-state density.

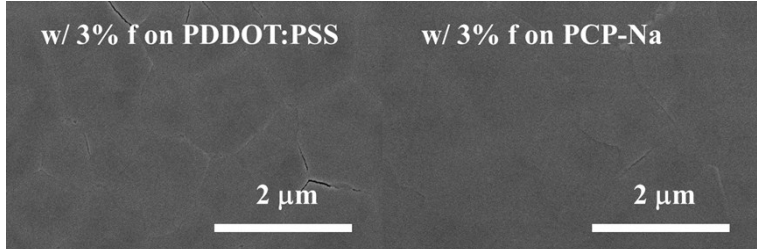

**Figure S7.** Top-view SEM images of  $(\text{BA,GA})_2\text{MA}_4\text{Pb}_5\text{I}_{16}$  perovskite films fabricated with 3% formamide addition on (a) PEDOT:PSS and (b) PCP-Na substrate.

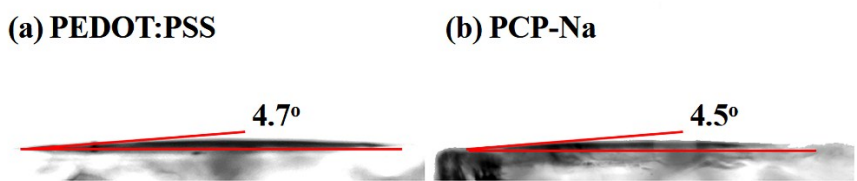

**Figure S8.** Water contact angle of (a) PEDOT:PSS and (b) PCP-Na substrates.

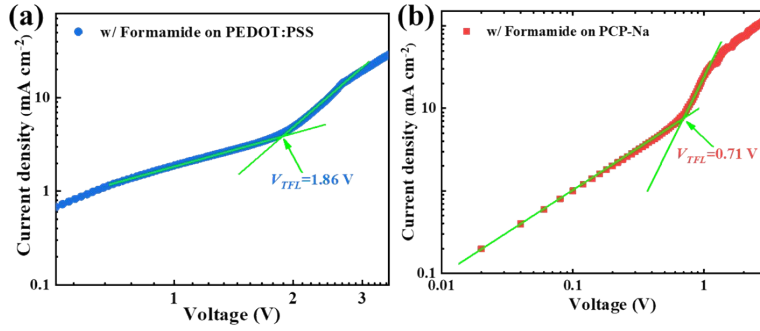

**Figure S9.** Dark current–voltage measurements of the hole-only devices for the  $(\text{BA,GA})_2\text{MA}_4\text{Pb}_5\text{I}_{16}$  perovskite on different substrates. The defect density could be calculated by equation  $N_{\text{defects}} = 2\epsilon\epsilon_0 V_{\text{TFL}} / eL^2$  (*Science* **2015**, 347, 967) ( $\epsilon$  and  $\epsilon_0$  are the dielectric constants of perovskite and the vacuum permittivity, respectively,  $L$  is the thickness of the obtained perovskite film, about 300 nm in this study, and  $e$  is the elementary charge). When  $\epsilon$  is constant,  $N_{\text{defects}}$  is in direct proportion to  $V_{\text{TFL}}$ . Therefore, the decrease of  $V_{\text{TFL}}$  indicating the reduced hole trap-state density.

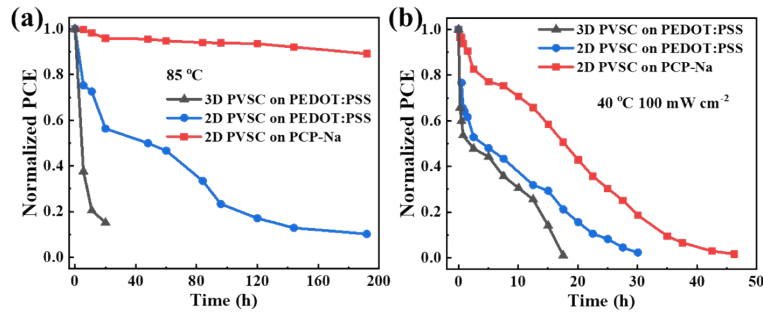

**Figure S10.** (a) Thermal stability and (b) light stability curves of the 2D and 3D PVSCs on different substrates, respectively.

**Table S1.** Time-resolved PL data of the  $(\text{BA,GA})_2\text{MA}_4\text{Pb}_5\text{I}_{16}$  perovskite films without and with formamide addition on quartz substrate.

|           | $\tau_1$ [ns] | $\tau_2$ [ns] | frac $\tau_1$ [%] | frac $\tau_2$ [%] | $\tau_{\text{ave}}$ [ns] |
|-----------|---------------|---------------|-------------------|-------------------|--------------------------|
| DMF w/o f | 0.44          | 3.83          | 47.92             | 52.08             | 2.20                     |
| DMF w/ f  | 1.14          | 7.87          | 25.29             | 74.71             | 6.17                     |
